# Supplementary material for: The Landscape of Telomere Length and Telomerase in Human Embryos at Blastocyst Stage
Source: MDPI journal article supplement (doi:10.3390/genes14061200), 2023-05-30
Supplement: s1 [file s1]

**Table S1.** Telomere length and telomerase gene expression in human blastocysts along with PGT-A diagnosis

| Subject#  | Embryos | Ploidy diagnosis                                  | Female age | Male age | Telomere length | <i>TERT</i> mRNA level |
|-----------|---------|---------------------------------------------------|------------|----------|-----------------|------------------------|
| Subject1  | Emb#1   | 47XY, +16                                         | 35         | 29       | 1.075           | 553.209                |
|           | Emb#2   | 45XX, -16                                         | 35         | 29       | 1.362           | 236.475                |
| Subject2  | Emb#3   | 50XY, +7, +10, +13, +21                           | 44         | 42       | 2.723           | 1005.345               |
|           | Emb#4   | 45XY, -3, +12, -15                                | 44         | 42       | 3.712           | 6581.294               |
| Subject3  | Emb#5   | 46XX, +5, -20                                     | 42         | 40       | 2.054           | 791.840                |
|           | Emb#6   | 45XY, -21                                         | 42         | 40       | 2.730           | 996.212                |
| Subject4  | Emb#7   | 45XY, -3                                          | 41         | 47       | 4.486           | 3024.060               |
|           | Emb#8   | 46XY, +2, -19                                     | 41         | 47       | 4.234           | 142.116                |
|           | Emb#9   | 48XX, +2, +20                                     | 41         | 47       | 1.466           | 285.401                |
| Subject5  | Emb#10  | 48XY, +11, +22                                    | 44         | 50       | 1.897           | 836.921                |
|           | Emb#11  | 42XO, -8, -15, -20                                | 44         | 50       | 2.296           | 611.990                |
|           | Emb#12  | 46XY, +17, -18                                    | 44         | 50       | 1.812           | 280.776                |
|           | Emb#13  | 47XY, +11                                         | 44         | 50       | 2.256           | 515.006                |
|           | Emb#14  | 45XXX, -2, -18                                    | 45         | 50       | 2.366           | 179.198                |
|           | Emb#15  | 44XX, -1, -13, -17, +18                           | 45         | 50       | 1.409           | 465.602                |
| Subject6  | Emb#16  | 50XY, +2, +3, +5, +8, +10, +11, -14, -21          | 43         | 38       | 2.230           | 1021.857               |
|           | Emb#17  | 49XY, +2, +18, +22                                | 43         | 38       | 1.493           | 0.193                  |
|           | Emb#18  | 46XX, +9, -11                                     | 43         | 38       | 0.880           | 213.255                |
|           | Emb#19  | 49XY, +16, +19, +22                               | 44         | 39       | 2.303           | 3107.096               |
|           | Emb#20  | 46XY, +4, -19                                     | 44         | 39       | 1.311           | 312.239                |
|           | Emb#21  | 53XY, +4(X3), -8, +11, +12, +19, +20, +21         | 44         | 39       | 2.150           | 1416.523               |
| Subject7  | Emb#22  | 69XXY                                             | 37         | 44       | 2.074           | 729.346                |
|           | Emb#23  | 45XX, -15                                         | 37         | 44       | 3.033           | 2815.888               |
|           | Emb#24  | 46XX, +2, -22                                     | 37         | 44       | 2.052           | 743.620                |
| Subject8  | Emb#25  | 45XX, -22                                         | 40         | 37       | 1.020           | 1400.894               |
| Subject9  | Emb#26  | 48XY, +1, +9q21.11-q21.13, -9, -12, +17, +20, +21 | 44         | 27       | 0.627           | 2348.987               |
|           | Emb#27  | 45XX, +15, -18, -20                               | 44         | 27       | 1.702           | 218.281                |
|           | Emb#28  | 45XX, -7, +16, -22                                | 44         | 27       | 1.421           | 2159.648               |
| Subject10 | Emb#29  | 45XY, +2, -14, -15, +21, -22                      | 45         | 43       | 2.025           | 1392.636               |
|           | Emb#30  | 47XX, -5p13.3-q11.2, -8, +11, +15, +18, -22       | 45         | 43       | 1.669           | 2688.786               |
|           | Emb#31  | 48XX, +19, +20                                    | 45         | 43       | 1.401           | 875.469                |
|           | Emb#32  | 47XXY, -11, +16, +19, -22                         | 45         | 43       | 1.568           | 33.690                 |
| Subject11 | Emb#33  | 45XX, -8                                          | 41         | 43       | 1.124           | 563.519                |
|           | Emb#34  | 49XYY, +5, +6, +21, -22                           | 41         | 43       | 2.052           | 1165.583               |
|           | Emb#35  | 45XY, +2q22.3-qter, -11, -18pter-p11.23           | 42         | 43       | 2.084           | 108.411                |
|           | Emb#36  | 46XY, -14, +18                                    | 42         | 43       | 1.818           | 251.431                |
| Subject12 | Emb#37  | 46XX, -18, +19                                    | 36         | 35       | 0.880           | 1550.650               |
|           | Emb#38  | 45XX, -15                                         | 36         | 35       | 0.974           | 3970.689               |
|           | Emb#39  | 45XX, -3                                          | 36         | 35       | 2.002           | 4166.658               |

|           |        |                                           |    |    |       |          |
|-----------|--------|-------------------------------------------|----|----|-------|----------|
|           | Emb#40 | 45XX, -2pter-p12                          | 36 | 35 | 1.246 | 972.976  |
|           | Emb#41 | 47XY, +8                                  | 36 | 35 | 1.130 | 500.445  |
| Subject13 | Emb#42 | 47XX, +9                                  | 40 | 37 | 1.339 | 1205.932 |
|           | Emb#43 | 45XX, -17, +18, -20                       | 40 | 37 | 2.188 | 75.853   |
|           | Emb#44 | 48XX, +19, +22                            | 40 | 37 | 1.121 | 547.299  |
|           | Emb#45 | 46XX, -14, +21                            | 40 | 37 | 3.205 | 666.940  |
|           | Emb#46 | Complex Abnormal                          | 40 | 37 | 1.218 | 766.369  |
|           | Emb#47 | 48XY, +13, +15                            | 40 | 37 | 1.220 | 334.713  |
| Subject14 | Emb#48 | 45XY, -7pter-7q14.2                       | 23 | 39 | 1.612 | 597.355  |
|           | Emb#49 | 47XY, +2                                  | 23 | 39 | 0.719 | 665.343  |
|           | Emb#50 | <b>45XX, -10</b>                          | 23 | 39 | 0.973 | 188.028  |
|           | Emb#51 | 47XX, +7                                  | 23 | 39 | 0.873 | 571.146  |
| Subject15 | Emb#52 | 47XX, +1, +14, -21                        | 34 | 32 | 1.096 | 451.165  |
|           | Emb#53 | 44XY, -2pter-p24.1, -8                    | 34 | 32 | 1.156 | 1021.743 |
|           | Emb#54 | 43XY, -2, +4, -5, -10, -15, -18, +21      | 34 | 32 | 1.282 | 287.770  |
| Subject16 | Emb#55 | 44XY, -11, -16                            | 41 | 40 | 1.142 | 1000.144 |
|           | Emb#56 | 47XY, +22                                 | 41 | 40 | 1.664 | 1420.327 |
|           | Emb#57 | 45XY, -11                                 | 41 | 40 | 1.910 | 1196.533 |
|           | Emb#58 | 47XY, +20                                 | 41 | 40 | 1.368 | 2094.977 |
| Subject17 | Emb#59 | 48XX, +6, +12                             | 40 | 39 | 1.339 | 1143.367 |
|           | Emb#60 | 47XX, -11, +18, +21                       | 40 | 39 | 1.646 | 584.421  |
|           | Emb#61 | 47XY, +15, -18, +19                       | 40 | 39 | 1.125 | 254.187  |
|           | Emb#62 | 45XY, -7, +16, -19                        | 40 | 39 | 2.435 | 681.753  |
|           | Emb#63 | 49XX, +9, +11, +15                        | 40 | 39 | 1.375 | 276.846  |
|           | Emb#64 | 47XY, +16                                 | 40 | 39 | 1.981 | 437.249  |
| Subject18 | Emb#65 | 45XX, -21                                 | 38 | 36 | 2.224 | 1904.478 |
|           | Emb#66 | 45XY, -2                                  | 38 | 36 | 1.871 | 275.114  |
|           | Emb#67 | 45XY, -16                                 | 38 | 36 | 2.395 | 124.754  |
| Subject19 | Emb#68 | Complex Abnormal                          | 37 | 37 | 1.793 | 593.111  |
| Subject20 | Emb#69 | 44XY, -12[mos], +13, -14[mos], -17        | 43 | 30 | 3.077 | 431.343  |
|           | Emb#70 | 45XY, -12, -21, +22                       | 43 | 30 | 5.946 | 643.781  |
|           | Emb#71 | 47XY, +18q22.2-qter, +22                  | 43 | 30 | 2.451 | 406.369  |
|           | Emb#72 | 51XY, +5, -7p14.1-qter, +9, +10, +14, +16 | 43 | 30 | 2.929 | 1004.621 |
|           | Emb#73 | 47XX, +14                                 | 43 | 30 | 2.738 | 349.990  |
| Subject21 | Emb#74 | 45XX, -15                                 | 38 | 38 | 6.011 | 638.846  |
|           | Emb#75 | 47XY, +14                                 | 38 | 38 | 1.696 | 226.405  |
|           | Emb#76 | 47XX, -10q25.1-qter, +18                  | 38 | 38 | 2.638 | 186.362  |
|           | Emb#77 | Complex Abnormal                          | 38 | 38 | 1.350 | 185.202  |
| Subject22 | Emb#78 | Complex Abnormal                          | 23 | 32 | 1.983 | 236.265  |
|           | Emb#79 | 45XY, -20                                 | 23 | 32 | 2.752 | 971.071  |
|           | Emb#80 | 46XY, +18q22.1-qter                       | 23 | 32 | 1.931 | 833.403  |
|           | Emb#81 | 46XY, -16q12.1-qter[mos]                  | 23 | 32 | 2.097 | 393.045  |

|           |         |                                         |           |    |        |           |
|-----------|---------|-----------------------------------------|-----------|----|--------|-----------|
|           | Emb#82  | 46XY, -2q14.1-qter[mos]                 | 23        | 32 | 2.019  | 318.888   |
|           | Emb#83  | 45XO, -17q11.2-qter[mos]                | 23        | 32 | 2.083  | 241.611   |
| Subject23 | Emb#84  | 45XY, -13q31.3-qter, -13pter-q14.3, -19 | 39        | 34 | 1.945  | 522.407   |
|           | Emb#85  | 47XX, +14, +16, -20                     | 39        | 34 | 1.570  | 723.355   |
| Subject24 | Emb#86  | 47XY, +16                               | 40        | 40 | 3.643  | 177.502   |
|           | Emb#87  | 46XY, +9, -16                           | 40        | 40 | 3.125  | 358.269   |
|           | Emb#88  | 45XY, -11pter-q11[mos], -15             | 41        | 40 | 2.077  | 1475.982  |
|           | Emb#89  | 45XX, -6q24.2-qter[mos], -13            | 41        | 40 | 1.506  | 690.041   |
| Subject25 | Emb#90  | <b>44XY, +8, -17, -18, -22</b>          | <b>43</b> | 48 | 3.241  | 1.622     |
|           | Emb#91  | <b>47XX, +2, +4, -13</b>                | <b>43</b> | 48 | 2.706  | 1838.595  |
|           | Emb#92  | <b>46XO, +6</b>                         | <b>43</b> | 48 | 13.471 | 317.737   |
|           | Emb#93  | <b>46XY, -6, +11, -19, +22</b>          | <b>43</b> | 48 | 7.776  | 366.179   |
|           | Emb#94  | 47XY, +16                               | <b>43</b> | 48 | 1.599  | 2384.584  |
|           | Emb#95  | <b>51XX, +2, +14, +15, +19, +22</b>     | <b>43</b> | 48 | 3.639  | 902.420   |
|           | Emb#96  | <b>49XY, +2, +21, +22</b>               | <b>43</b> | 48 | 7.446  | 888.212   |
|           | Emb#97  | <b>45XX, -15</b>                        | <b>43</b> | 48 | 8.031  | 12505.125 |
| Subject26 | Emb#98  | 46XY                                    | <b>32</b> | 33 | 1.243  | 1003.818  |
|           | Emb#99  | 46XX                                    | <b>32</b> | 33 | 1.757  | 2.644     |
|           | Emb#100 | <b>48XX, +2, +3</b>                     | <b>32</b> | 33 | 1.069  | 1273.324  |
|           | Emb#101 | <b>45XX, -22</b>                        | <b>32</b> | 33 | 2.848  | 2593.973  |
| Subject27 | Emb#102 | 47XX, +16                               | <b>42</b> | 38 | 2.810  | 3002.077  |
|           | Emb#103 | <b>45XY, +11, -15, -22</b>              | <b>42</b> | 38 | 3.427  | 523.162   |
|           | Emb#104 | 46XY, +22                               | <b>42</b> | 38 | 1.209  | 651.713   |
|           | Emb#105 | <b>46XY, -7, -8, +18, +22</b>           | <b>42</b> | 38 | 1.617  | 1.892     |
| Subject28 | Emb#106 | <b>45XX, -20</b>                        | <b>43</b> | 60 | 1.627  | 5527.298  |
|           | Emb#107 | <b>47XY, +10, -17, +21</b>              | <b>43</b> | 60 | 1.541  | 2561.415  |
|           | Emb#108 | 46XX, +22                               | <b>43</b> | 60 | 1.189  | 589.391   |
|           | Emb#109 | <b>50XY, +14, +15, +17, +18</b>         | <b>43</b> | 60 | 2.071  | 1092.968  |
|           | Emb#110 | <b>45XY, -12, -16, +22</b>              | <b>43</b> | 60 | 1.034  | 35.067    |
|           | Emb#111 | <b>45XY, -21</b>                        | <b>43</b> | 60 | 1.432  | 1239.359  |
|           | Emb#112 | <b>46XY, -7, +15, +19, -20</b>          | <b>43</b> | 60 | 1.611  | 3840.670  |
| Subject29 | Emb#113 | 46XX                                    | 39        | 50 | 1.000  | 1.000     |
|           | Emb#114 | 45XY, -13, -19, +22                     | 39        | 50 | 1.558  | 878.699   |
|           | Emb#115 | 45XY, -5, -19, +22[mos]                 | 39        | 50 | 1.430  | 272.808   |
| Subject30 | Emb#116 | 46XX                                    | 29        | 36 | 1.041  | 67.364    |
|           | Emb#117 | 47XX, +1[mos], +9[mos], -10             | 29        | 36 | 1.087  | 4.751     |
|           | Emb#118 | 46XX, +1[mos], -9, -15, +16[mos]        | 29        | 36 | 1.333  | 220.016   |
|           | Emb#119 | 45XX, -22[mos]                          | 29        | 36 | 1.600  | 185.187   |

[mos] = mosaic; Complex Abnormal means the details about chromosomal abnormality is not available from PGT-A report.

**Table S2.** Relative Telomerase Activity in individual embryos with PGT-A diagnosis

| Sample                            | Cq Value      | Relative<br>Telomerase Activity<br>by $2^{-\Delta Cq}$ | Maternal<br>age | Ploidy Diagnosis by PGT-A                       |
|-----------------------------------|---------------|--------------------------------------------------------|-----------------|-------------------------------------------------|
| Emb121                            | 23.142        | 5.763                                                  | 30              | 46XX                                            |
| Emb122                            | 22.872        | 6.952                                                  | 33              | 46XX                                            |
| Emb123                            | 23.667        | 4.005                                                  | 33              | 47XX, +12[mos]                                  |
| Emb124                            | 22.861        | 7.004                                                  | 39              | 45XX, -22[mos]                                  |
| Emb125                            | 23.838        | 3.557                                                  | 40              | 45XY, -11q22.1-qter[mos]                        |
| Emb126                            | 22.573        | 8.549                                                  | 33              | 48XX, -7[m], +14[mos], +18[mos], +19 [mos]      |
| Emb127                            | 24.126        | 2.915                                                  | 30              | 45XY, -9pter-p21.1                              |
| Emb128                            | 23.695        | 3.929                                                  | 34              | 45XX, -15                                       |
| Emb129                            | 24.498        | 2.252                                                  | 42              | 45XX, -2                                        |
| Emb130                            | 24.376        | 2.450                                                  | 42              | 45XX, -22                                       |
| Emb131                            | 23.360        | 4.956                                                  | 42              | 45XX, -7                                        |
| Emb132                            | 23.689        | 3.945                                                  | 41              | 47XY,+16                                        |
| Emb133                            | 23.360        | 4.956                                                  | 42              | 48XY, +16[mos], +21                             |
| Emb134                            | 24.270        | 2.637                                                  | 42              | 46XY, -3pter-p24.1, +22                         |
| Emb135                            | 23.450        | 4.655                                                  | 43              | 48XY, +3, +22                                   |
| Emb136                            | 24.407        | 2.398                                                  | 43              | 48XX, +15, +22                                  |
| Emb137                            | 24.286        | 2.608                                                  | 42              | 48XX, +6, +22                                   |
| Emb138                            | 26.120        | 0.731                                                  | 37              | 44XX, -9, -10                                   |
| Emb139                            | 25.617        | 1.037                                                  | 42              | 46XY, +3, -8, +17, -21                          |
| Emb140                            | 26.247        | 0.670                                                  | 39              | 46XY, -2, +14, -21, +22                         |
| Emb141                            | 27.027        | 0.390                                                  | 39              | 44XY, +1, -2, -15, -19                          |
| Emb142                            | 25.555        | 1.083                                                  | 39              | 47XX, +8, +11, -16                              |
| Emb143                            | 23.756        | 3.766                                                  | 42              | 45XX, -12, +21, -22                             |
| Emb144                            | 24.940        | 1.658                                                  | 41              | Complex Abnormal                                |
| Emb145                            | 23.887        | 3.438                                                  | 45              | 45XX, -9, -17, +21                              |
| Emb146                            | 24.430        | 2.360                                                  | 42              | 41XX, -4, -15, -17, -20, -22                    |
| Emb147                            | 23.760        | 3.756                                                  | 42              | 43XY, -2, +8, +12, -13, -16, -18[mos], -21[mos] |
| Emb148                            | 24.960        | 1.635                                                  | 43              | 45XY, -14, -19, +22                             |
| Positive Sample                   | 25.669        | 1.000                                                  | NA              | NA                                              |
| <i>Heated Positive<br/>Sample</i> | <b>38.271</b> | <b>0.000</b>                                           | <b>NA</b>       | <b>NA</b>                                       |
| Water                             | 0.000         | 0.000                                                  | NA              | NA                                              |

[mos] = mosaic; Complex Abnormal means the details about chromosomal abnormality is not available from PGT-A report.
